# Supplementary material for: Laccase aggregates via poly-lysine-supported immobilization onto PEGA resin, with efficient activity and high operational stability and can be used to degrade endocrine-disrupting chemicals
Source: Royal Society of Chemistry journal article supplement (doi:10.1039/d0cy01413c), 2020-11-26
Supplement: d0cy01413c1.pdf [file d0cy01413c1.pdf]

**Electronic Supplementary Information**

**Laccase aggregates *via* poly-lysine-supported immobilization onto PEGA resin, with efficient activity and high operational stability and can be used to degrade endocrine-disrupting chemicals**

Hiroshi Yamaguchi<sup>a, b, c, \*</sup> and Masaya Miyazaki<sup>d</sup>

*<sup>a</sup>Liberal Art Education Center, Tokai University, 9-1-1 Toroku, Higashi-ku, Kumamoto, Kumamoto 862-8652, Japan*

*<sup>b</sup>Graduate School of Agriculture, Tokai University, 9-1-1 Toroku, Higashi-ku, Kumamoto, Kumamoto 862-8652, Japan*

*<sup>c</sup>Graduate School of Bioscience, Tokai University, 9-1-1 Toroku, Higashi-ku, Kumamoto, Kumamoto 862-8652, Japan*

*<sup>d</sup>Center of Plasma Nano-interface Engineering, Kyushu University, 744 Motoooka, Nishi-ku, Fukuoka 819-0395, Japan*

\* Corresponding author. Tel: +81-96-386-2661. E-mail: yamahiro@tokai-u.jp

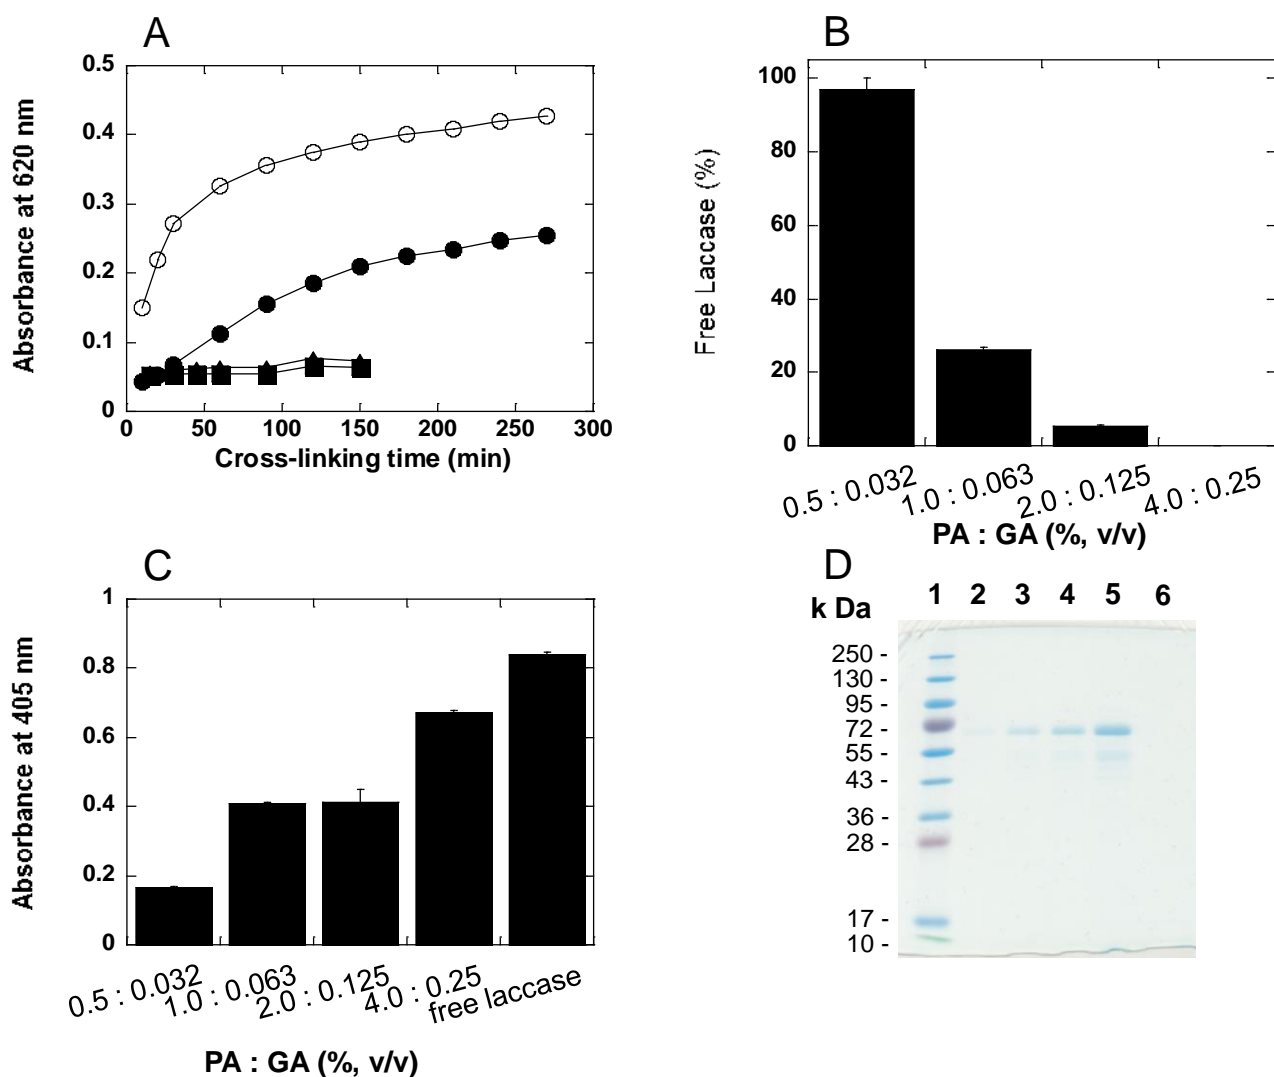

**Fig. S1** Cross-linking conditions of poly-Lys supported laccase immobilization. (A) Effect of poly-Lys ratio. Poly-Lys/laccase ratios: 0.5 (closed square), 1.0 (closed triangle), 2.0 (closed circle) and 4.0 (open circle). (B) Effect of cross-linker concentration on cross-linking yield. (C) Effect of cross-linker concentration on the activity of immobilized laccase. A mixture of GA and PA was used at a ratio of 1:16 (v/v). The graphs show the mean  $\pm$  standard error of at least three experiments. (D) SDS-PAGE analysis of Lac-PEGA, 12% stacking gel, dyed by Coomassie R250. The lane 1 is the marker of standard proteins, lane 2-5 show free laccase (1, 3, 5 and 10  $\mu$ g). Sample that was prepared from Lac-PEGA (15 $\mu$ g) was applied in lane 6.

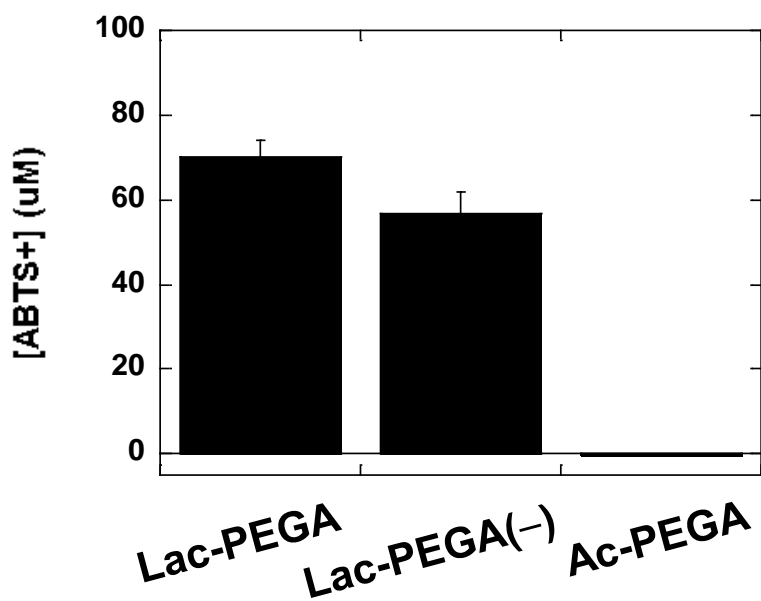

**Fig. S2** Enzymatic activity of Lac-PEGA, Lac-PEGA(-) and Ac-PEGA. The activity was measured in 50 mM acetate buffer (pH 4.5) at 30°C for 10 min. The concentration of ABTS was 100  $\mu$ M. The graphs show the mean  $\pm$  standard error of at least three experiments.

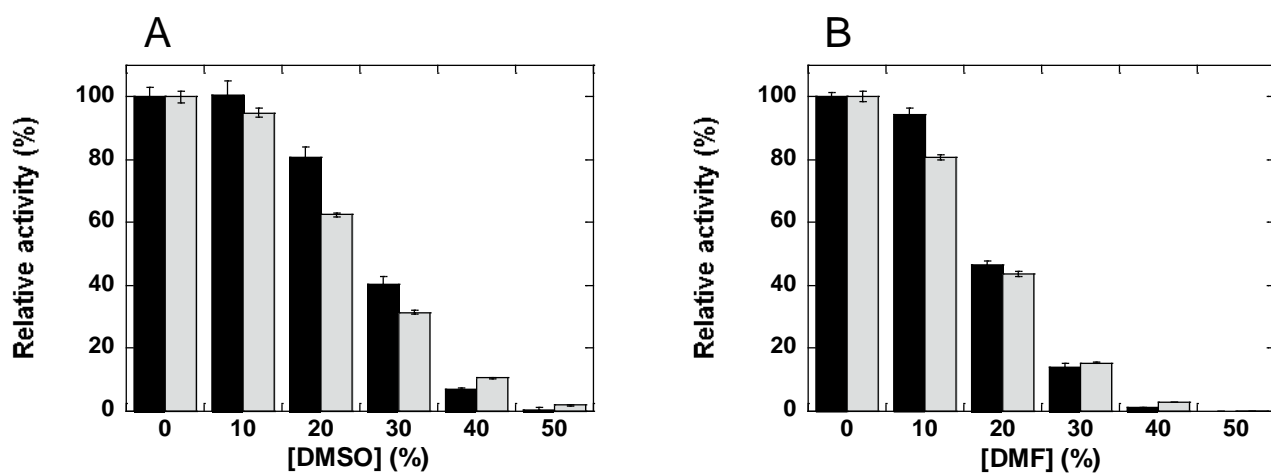

**Fig. S3** Effect of DMSO (A) or DMF (B) on activity of Lac-PEGA (black) and free laccase (gray). The activity was measured in 50 mM acetate buffer (pH 4.5) at 30°C for 10 min. The results are presented as relative activity with respect to the activity of a single laccase molecule in the absence of each organic solvent. The concentration of ABTS, Lac-PEGA and free laccase was 100  $\mu\text{M}$ , 15  $\mu\text{g mL}^{-1}$  and 10  $\mu\text{g mL}^{-1}$ , respectively. The graphs show the mean  $\pm$  standard error of at least three experiments.
